# Supplementary material for: Antioxidant and UV-Blocking Functionalized Poly(Butylene Succinate) Films
Source: MDPI journal article supplement (doi:10.3390/compounds3010015), 2023-02-09
Supplement: s1 [file s1]

Archive with 1 entries (1 files):
- compounds-2147109-supplementary.pdf
